# Supplementary material
Source: PubMed Central journal article supplement (PMC3021963)
Supplement: NIHMS260059-supplement-SI.pdf [file NIHMS260059-supplement-SI.pdf]

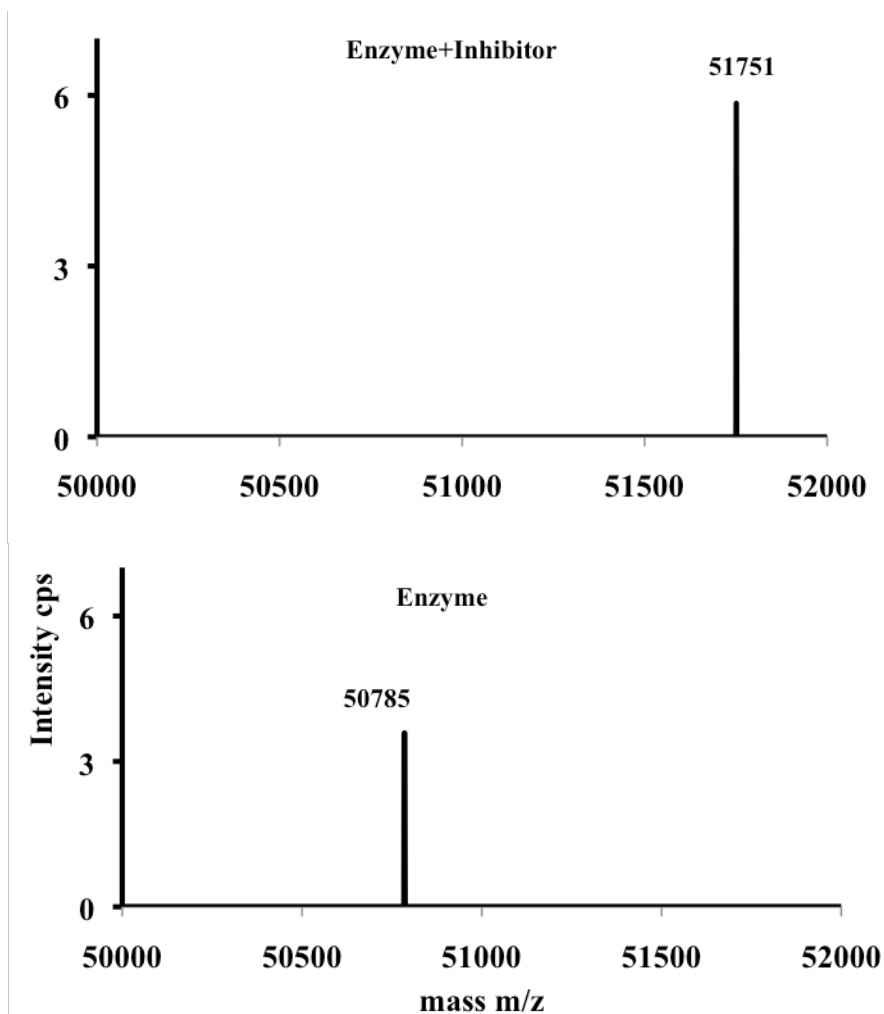

**Figure S1. MS Analysis of MbtI +/- inhibitor** Mass spectrometry analysis of MbtI. A)  $m/z$  calcd for recombinant MbtI = [native-MbtI + MGSSHHHHHHSSGLVPRGSH (amino acid sequence introduced from pET19) – N-terminal methionine]: 50787, found: 50785. B) Recombinant MbtI treated with **2**.  $m/z$  calcd for [protein + 4 × **2**] 51751, found: 51751.

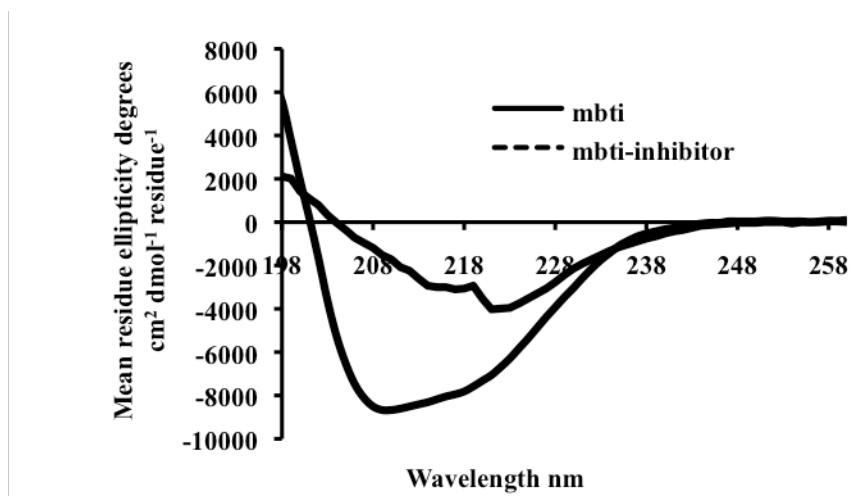

**Figure S2. CD Spectra of MbtI +/- inhibitor.** MbtI (12  $\mu\text{M}$ ) in 20 mM phosphate buffer (pH 7.4) (solid line) and MbtI incubated with benzisothiazolone **2** (hashed line).

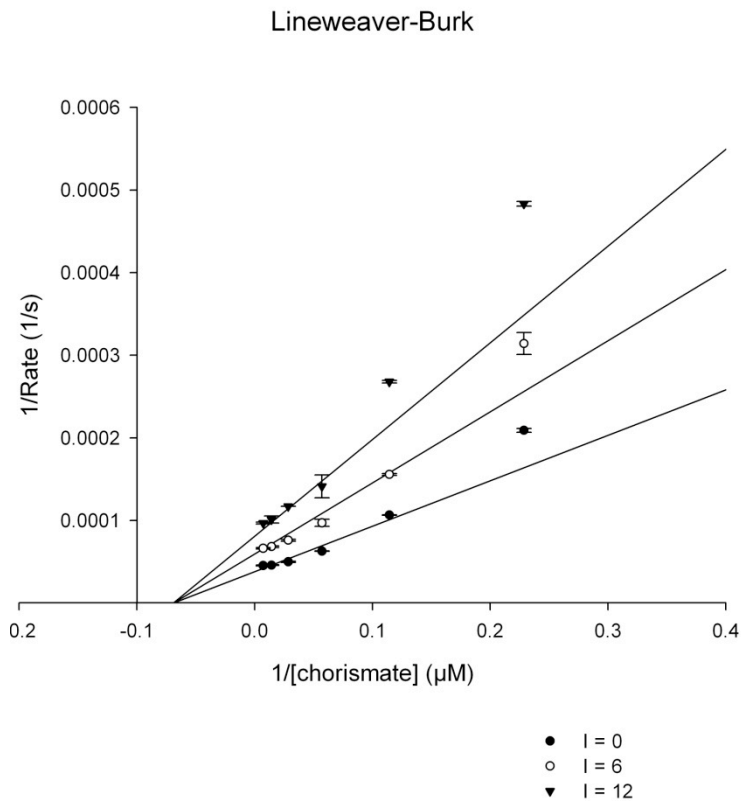

**Figure S3. Lineweaver-Burk Plot for compound 4.** Double reciprocal plot of initial velocity versus salicylic acid at different concentration of **4**: 0  $\mu\text{M}$  (●), 6  $\mu\text{M}$  (○), 12  $\mu\text{M}$  (▼). The data were fit to a noncompetitive inhibition model with  $K_i = 10.6 \pm 0.65$ ,  $\alpha = 1$ .
